# Supplementary material for: Comorbidity of psychiatric and dermatologic disorders with skin picking disorder and validation of the Skin Picking Scale Revised for Brazilian Portuguese
Source: PubMed Central journal article supplement — Braz J Psychiatry. 2022 Sep 19;44(6):621–7. doi: 10.47626/1516-4446-2021-2400 (PMC9851763; doi:10.47626/1516-4446-2021-2400), 2022-09-19
Supplement: bjp-44-06-621-suppl1.pdf [file bjp-44-06-621-suppl1.pdf]

**Supplementary Material S1** Skin Picking Scale Revised – Brazilian version. The severity score can be calculated as the sum of the items 1-4, and the impairment score can be calculated as the sum of items 5-8

### **Escala de Dermatotilexomania Revisada (SPS-R) – versão traduzida para o Português brasileiro**

Essa escala autoaplicável avalia a gravidade da dermatotilexomania/*skin picking* através de 8 itens em escala de 0-4 com crescente gravidade, gerando escore total de 0-32 pontos. Ela avalia os sintomas na ÚLTIMA SEMANA, gerando subescores de gravidade e de impacto. **Com relação à ÚLTIMA SEMANA:**

#### **1. Com que frequência você sente o impulso de lesar sua pele?**

0 - Sem impulsos.

1 - Leve, ocasionalmente sinto impulsos de lesar a pele, menos de 1h/dia.

2 - Moderada, frequentemente sinto impulsos de lesar a pele, 1-3h/dia.

3 - Intensa, com muita frequência sinto impulsos de lesar a pele, maior do que 3 e até 8h/dia.

4 - Extrema, constantemente ou quase sempre sinto impulsos de lesar a pele.

#### **2. Quão intensos ou fortes são os impulsos de lesar a sua pele?**

0 - Mínimos ou inexistentes.

1 - Leves.

2 - Moderados.

3 - Intensos.

4 - Extremos.

#### **3. Quanto tempo você gasta lesando sua pele por dia?**

0 - Nenhum.

1 - Pouco, gasto menos do que 1h/dia lesando a pele, ou lesiono ocasionalmente.

2 - Moderado, gasto de 1-3h/dia lesando minha pele, ou lesiono frequentemente.

3 - Muito, gasto mais do que 3 e até 8h/dia lesando minha pele, ou lesiono muito frequentemente.

4 - Exagerado, gasto mais do que 8h/dia lesando minha pele, ou quase constantemente lesiono minha pele.

#### **4. Quanto controle você tem sobre o seu impulso de lesar a pele? Em qual grau você consegue evitar lesar sua pele?**

0 - Controle completo. Sou sempre capaz de evitar que eu lese minha pele.

1 - Muito controle. Eu normalmente consigo evitar lesar minha pele.

2 - Médio controle. Eu às vezes consigo evitar lesar minha pele.

3 - Pouco controle. Eu sou raramente capaz de evitar lesar minha pele.

4 - Sem controle. Eu nunca sou capaz de evitar lesar minha pele.

#### **5. Quanta angústia emocional (ansiedade/preocupação, frustração, depressão, desesperança, ou sentimentos de baixa auto-estima) você experiencia a partir do ato de lesar sua pele?**

0 - Sem angústia emocional ao lesar a pele.

1 - Leve, apenas uma ligeira angústia emocional ao lesar a pele. Eu ocasionalmente me sinto emocionalmente angustiado(a) a partir do ato, mas apenas em pequeno grau.

2 - Moderada, uma quantidade significativa de angústia emocional ao lesar a pele. Eu, com frequência, sinto angústia emocional a partir do ato.

3 - Intensa, uma grande quantidade de angústia emocional ao lesar a pele. Eu quase sempre sinto angústia emocional por causa do ato.

4 - Extrema, angústia emocional constante. Eu sinto uma constante angústia emocional e não tenho esperanças de que isso mude.

**6. O quanto o seu ato de lesar a própria pele interfere na sua vida social, trabalho (ou funcionalidade)? (Se não está trabalhando no momento, determine o quanto sua performance seria afetada caso fosse empregado.)**

0 - Não interfere.

1 - Pouco, ligeira interferência em atividades sociais ou ocupacionais, mas, no geral, a performance não é prejudicada.

2 - Moderadamente, definitiva interferência nas performances social e ocupacional, mas ainda administrável.

3 - Muito, causa dano substancial nas performances social ou ocupacional.

4 - Extremamente, incapacitante.

**7. Você tem evitado fazer qualquer coisa, ir a qualquer lugar, ou estar com qualquer pessoa por causa do ato de lesar a sua pele? Se sim, o quanto você evita?**

0 - Não evito.

1 - Pouco, evitação ocasional em situações sociais ou de trabalho.

2 - Moderadamente, evitação frequente em situações sociais ou de trabalho.

3 - Muito, evitação muito frequente em situações sociais ou de trabalho.

4 - Extremamente, evitação em todas as situações sociais ou de trabalho em decorrência do ato de lesar a própria pele.

**8. Quanto dano você tem na pele atualmente por causa do ato de lesar a própria pele? Considerar somente danos produzidos pelo ato de lesar.**

0 - Nenhum (sem dano na pele pelo ato de lesar).

1 - Leve (ligeiro dano na forma de pequenas crostas, feridas, arranhões etc. Dano cobre uma área muito pequena e não há tentativa de cobri-lo ou tratá-lo).

2 - Moderado (notáveis cicatrizes, crostas ou pequenas feridas abertas (< 1cm de diâmetro)). O ato de lesar a pele resulta em tentativas de cobrir ou tratar o dano com remédios caseiros (por exemplo, ataduras, cremes, pomadas) os quais não exigem assistência de um médico.

3 - Intenso (grandes cicatrizes, crostas ou feridas abertas (>1cm de diâmetro)), áreas infectadas e/ou notável pele desfigurada. O ato de lesar a pele resulta em tentativas extensas de cobrir o dano e talvez exija tratamento periódico por um profissional médico (por exemplo, prescrição de antibióticos, dermoabrasão etc).

4 - Extremo (grandes feridas abertas ou crateras, sangramento frequente, grandes áreas com cicatrizes). Dano talvez exija cobertura extensiva e intervenção médica (por exemplo, cirurgia plástica, pontos, hospitalização etc).

Escore total:\_\_\_\_\_ Subescore severidade:\_\_\_\_\_ Subescore prejuízo:
